# Supplementary material for: Targeting senescent cells by dasatinib and quercetin ameliorates postmenopausal osteoporosis and rejuvenates bone regeneration.
Source: Research Square preprint supplement (doi:10.21203/rs.3.rs-1444778/v1), 2022-04-06
Supplement: Supplementary file 1 [file 7383650adba25540b1f3ec13.xlsx]

## Sheet: Sheet1
Table S5. DEGs identified in DQ vs. OVX analysis.
Gene ID	Gene Symbol	DQ TPM	DQ_r1 TPM	DQ_r2 TPM	OVX TPM	OVX_r1 TPM	OVX_r2 TPM	log2 (DQ / OVX)
100192314	Inafm1	12.34	10.85	13.45	23.54	21.15	22.6	-0.836412
100310874	Parpbp	5.14	6.12	5.17	2.75	3.44	3.45	0.819257
100359485	Ms4a18	0.73	1.15	0.93	2.61	1.65	2.05	-1.13106
100359583	LOC100359583	162.02	177.67	175.71	107.32	115.86	119.1	0.633911
100359731	Tipinl1	12.17	12.48	10.83	7.26	7.09	8.57	0.673025
100360380	LOC100360380	1.66	1.36	1.36	2.34	2.32	2.18	-0.601694
100360679	Rps18l1	0	0	0	0	0	56.68	-22.3255
100362333	LOC100362333	22.1	25.02	34.27	16.61	19.15	18.77	0.623534
100364016	LOC100364016	30.23	34.3	30.52	19.57	19.64	16.96	0.804394
100366216	LOC100366216	1.87	1.41	0.85	3.65	2.5	2.46	-1.00577
100909476	LOC100909476	2.15	2.29	1.88	4.11	3.81	3.2	-0.764975
100909664	LOC100909664	2.62	3.27	2.5	1.59	1.79	1.79	0.748824
100910231	Zfp82	1.64	1.24	1.71	2.31	2.55	2.8	-0.590832
100910418	LOC100910418	1.61	0.51	0.81	0.26	0	0	3.6664
100910462	LOC100910462	0.45	0.64	0.63	0	0	0	5.58068
100910795	LOC100910795	3.18	4.24	1.75	8.2	5.17	6.39	-1.02866
100910838	LOC100910838	0.25	0.31	0.15	0	0	0	5.02266
100911261	LOC100911261	47.56	42.99	51.35	83.89	71.98	87.9	-0.737129
100911511	LOC100911511	2.19	1.32	1.93	3.54	2.96	2.97	-0.775161
100911615	LOC100911615	0	0	0	0	13.1	0	-22.9023
100911625	LOC100911625	61.14	50.85	50.72	36.72	44.13	29.52	0.605662
100911779	LOC100911779	4.48	3.65	3.88	7.38	8.54	4.6	-0.725587
100911959	LOC100911959	5.58	1.8	6.09	19.13	9.13	16.07	-1.6815
100912478	LOC100912478	2.32	3.46	3.35	1.2	1.42	0.55	1.60344
100912571	LOC100912571	0	0	0	0	0	13.77	-22.7783
100912611	LOC100912611	3.29	3.94	4.33	2.21	2.45	2.33	0.766912
102550530	LOC102550530	11.32	12.22	14.94	35.4	19.27	41.24	-1.28499
102551085	Xrcc3	2.94	2.41	2.99	4.65	5.47	3.72	-0.666599
102551140	LOC102551140	9.4	7.31	8.42	14.32	15.21	12.83	-0.712013
102552659	LOC102552659	2.04	1.9	1.59	3.95	2.68	4.08	-0.932063
102553001	LOC102553001	1.13	0.9	1.14	2.06	1.95	1.65	-0.821954
102555341	LOC102555341	6.33	4.9	5.23	3.55	3.73	2.8	0.757907
102556672	LOC102556672	2.15	1.73	2.42	4.18	4.73	2.91	-0.861737
103689921	NEWGENE_1306267	1.8	3.1	0.78	5.66	3.26	6.97	-1.44527
103689951	LOC103689951	13.49	11.94	17.8	28.46	20.13	27.36	-0.777554
103689954	LOC103689954	0.27	0.8	0.38	1.1	1.58	1.29	-1.39579
103689983	LOC103689983	67.09	61.84	73.07	40.3	50.07	42.99	0.643328
103690002	LOC103690002	22.37	20.56	17.92	7.7	10.28	4.77	1.5093
103690007	LOC103690007	0.28	0.42	0.14	0.77	0.63	0.91	-1.46101
103690067	LOC103690067	1.72	1.24	1.36	3.34	2.12	3.43	-1.01263
103690106	LOC103690106	0.32	0.54	0.11	1.51	1.62	0.76	-2.05737
103690128	LOC103690128	2.55	1.43	1.89	4.12	4.34	2.47	-0.84527
103690173	LOC103690173	1.68	2.45	2.85	0.46	0.79	0.86	1.78029
103691034	Peg3	7.68	7.07	7.81	12.49	14.27	11.05	-0.699591
103692170	LOC103692170	2.68	2.21	2.11	4.19	4.6	3.33	-0.748013
103694586	LOC103694586	2	1.18	0	13.11	2.04	2.83	-2.71881
103694864	LOC103694864	2.71	2.96	2.96	5.39	4.95	4.97	-0.782253
103694866	LOC103694866	0	0	0	10	5.36	10.67	-10.311
103694902	LOC103694902	0.01	0.01	0.01	0.01	50.75	0.03	-24.3322
108348048	LOC108348048	4.21	6.05	4.7	25.75	27.41	3.99	-2.26794
108348178	Vps37c	3.86	4.39	3.45	4.14	6.58	8.02	-0.619426
108348189	LOC108348189	0.5	0.39	0.36	0	0	0	4.58172
108349745	LOC108349745	2.98	2.07	3.23	2.04	0.8	1.48	0.986423
108352634	LOC108352634	1.45	1.34	1.36	3.52	4.36	3.01	-1.35348
113910	Prnd	11.77	12.29	11.32	19.95	21.65	20.35	-0.765571
113992	Ugt1a6	11.33	8.08	9.4	5.84	6.03	4.96	0.821888
114002	Ndst2	4.53	3.64	5.08	5.26	6.38	7.98	-0.600689
114108	Pdlim3	0.17	0.61	0.61	1.36	2.51	2.08	-2.0414
114482	Nek2	11.52	8.96	9.84	4.9	5.99	5.77	0.904735
114494	Ccna2	44.68	47.15	44.82	23.03	24.28	23.2	0.938345
114555	Casp4	39.12	37.34	34.11	65.94	60.85	68.53	-0.781055
114592	Aurkb	24.9	22.79	25.29	13.26	15.8	13.73	0.820402
114637	Hmgn2	178.9	186.96	173.86	116.25	119.15	124.56	0.626319
114767	Ptpre	3.81	3.76	3.35	2.34	2.41	2.14	0.75
116468	Rfc2	19.92	18.54	17.62	12.35	12.38	13.44	0.595036
116487	Tgfbi	51.49	50.96	49.55	23.43	28.48	25.18	1.02344
116548	Pcsk5	2.38	2.44	3.11	4.17	4.39	4.71	-0.700199
116640	Tnc	854.43	784.97	814.37	1401.6	1502.38	1341.35	-0.679673
116647	Nlgn1	0.66	0.65	0.43	1.41	1.11	1.25	-1.08451
116685	Lmnb1	22.97	21.54	23.14	12.55	14.96	12.79	0.791422
116721	Abcc5	14.44	11.82	15.14	22.2	24.96	19.88	-0.606431
117064	Vip	22.93	26.71	25.86	8.83	8.6	10.03	1.50124
117183	Rgcc	48.53	49.35	48.31	83.51	86.27	87.95	-0.776
117264	P2ry6	6.75	6.51	6.37	17	16.89	16.25	-1.34855
117275	Chrd	2.64	3.65	3.5	5.64	6.85	5.84	-0.857793
117524	Ccnf	9.23	8.61	8.77	4.52	5.85	5.05	0.829661
140586	Sox9	3.11	1.94	2.78	4.74	5.29	4.69	-0.86659
140914	Olr1	4.6	4.34	4.74	12.55	14.99	10.95	-1.4468
140937	Higd1a	69.33	73.24	71.34	52.8	45.25	48.64	0.585672
170913	Abcb1a	4.66	4.66	4.39	7.03	9	7.36	-0.706837
171100	Angptl2	25.83	22.47	25.78	13.55	13.68	14.06	0.884281
171109	Dusp5	21.29	19.92	22.74	13.32	16.22	13.48	0.616558
171112	Wfdc1	184.84	169.84	181.33	461.29	428.06	415.96	-1.24284
171164	Gbp2	6	5.31	5.18	7.97	8.47	9.91	-0.637865
171178	Adh7	0.49	0.58	0.84	0.08	0.24	0.22	1.988
171287	Epha7	1.32	1.01	1.44	2.62	2.23	2.46	-1.06053
171297	Nlgn3	0.66	0.42	0.33	1.04	1.08	1.01	-1.22121
171304	Kif11	10.04	10.53	9.93	6.06	6.44	4.88	0.858224
171373	Slc12a5	0.83	0.88	0.73	1.58	1.5	1.15	-0.749612
171375	Atp5pb	0	0	18.56	0	0	0	21.6381
171529	Kif2c	11.48	12.36	12.57	6.2	7.08	8.02	0.814565
171576	Bub1b	8.02	7.61	7.75	4.11	4.28	4.55	0.894275
192227	Ptgr1	116.03	114.49	107.16	61.38	67.57	66.97	0.828268
192252	Dctpp1	30.54	35.67	30.02	20.56	18.67	20.3	0.734314
192270	Plpp3	43.1	40.73	42.52	75.3	73.2	69.47	-0.744098
207119	Rin1	0.28	1.36	1.27	0	0	0	6.90139
24180	Agtr1a	12.27	11.49	11.7	31.68	29.2	27.15	-1.26883
24314	Nqo1	705.89	722.47	694.75	338.25	325.22	321.69	1.15012
24323	Edn1	27.27	29.5	29.3	57.73	60.45	58.74	-1.00687
24330	Egr1	158.16	148.77	164.28	83.68	98.34	73.8	0.927469
24398	Gls	123.43	118.37	121.85	203.32	209.66	195.04	-0.704395
24450	Hmgcs2	9.92	9.61	11.5	17.68	16.39	17.72	-0.697979
24498	Il6	50.02	55.94	53.57	22.97	22.19	27.18	1.18067
24530	Lcat	8.48	4.32	9.38	15.57	15.1	11.18	-0.840191
24582	Myh11	61.1	57.74	61.75	113.43	117.25	107.02	-0.859822
24586	Ncam1	77.11	70.49	73.25	125.7	133.23	121.82	-0.765482
24587	Nefh	3.73	3.32	3.03	1.74	2.58	2.36	0.63637
245966	Tmem150a	35.75	32.56	38.16	59.97	61.71	54.94	-0.670607
245982	Coro6	2.08	2.12	2.07	4.23	4.15	3.11	-0.805801
246144	Il3ra	8.17	6.81	8.36	13.84	14.48	12.11	-0.764857
246249	Arhgap4	1.28	1.14	1.11	2.17	1.98	2.27	-0.797467
24626	Pde4b	27.86	29.29	29.8	17.79	18.23	15.57	0.798171
246273	Trib3	65.36	65.65	60.43	96.73	106.62	94.02	-0.591459
24766	Scn2a	0.78	0.74	0.86	1.59	1.44	1.19	-0.778223
24770	Ccl2	1377.02	1464.07	1435.39	976.58	923.84	945.07	0.629727
24787	Sod2	212	219.1	202.81	117.76	120.65	120.54	0.862739
24831	Thrb	0.82	0.66	0.85	1.41	1.32	1.19	-0.69888
24834	Tk1	50.31	51.04	48.18	30.48	31.54	28.95	0.760652
24906	LOC24906	7.7	9.04	8.59	5.49	6.68	4.77	0.618377
24913	Plaat3	21.45	18.81	16.74	27.36	27.01	34.62	-0.602724
25031	Plcb4	17.82	17.89	18	32.78	36.13	28.31	-0.806752
25056	Rbp1	3.52	4.49	4.29	9.49	10.22	9.34	-1.19364
25119	Mr1	2.86	2.97	3	4.41	6.31	4.22	-0.718656
25148	Egr3	3.67	2.72	2.63	1.39	1.6	1.31	0.795062
25203	Ccnb1	18.9	19.23	18.69	10.34	10.64	10.9	0.875861
25211	Lyz2	0.82	0.2	0.1	2.67	1.81	1.59	-2.40752
25247	Nsg1	39.4	41.17	41.85	14.66	15.66	14.57	1.49128
25249	Coq7	14.17	16	14.04	8.38	9.78	11.53	0.605032
25278	Cox6a2	15.14	16.97	19.23	35.71	34.19	30.71	-0.945616
252918	Spag5	15.16	14.82	14.19	11.1	11.25	9.65	0.605971
25296	Bmp4	11.03	9.55	11.18	17.09	16.04	16.38	-0.607059
25317	Fgf1	16.8	16.89	16.95	28.96	28.16	24.74	-0.645395
25339	Npr3	12.03	10.8	10.44	22.23	23.51	23.01	-1.12987
25358	Timp3	0.65	0.8	0.89	3.09	3.29	2.64	-1.89774
25367	Adarb1	11.55	10.78	11.34	29.24	29.48	26.75	-1.30078
25375	Aldh3a1	3.75	3.26	3.39	0.5	0.51	0.95	2.4412
25418	Dpysl3	62.1	61.41	57.59	94.86	109.87	86.74	-0.60815
25426	Cyp1b1	382.17	366.06	357.52	173.14	181.99	173.82	1.1128
25431	Dlx5	5.67	4.94	4.37	7.71	9.61	7.94	-0.71013
25445	Fosl1	54.74	51.73	53.93	32.24	33.25	33.41	0.739226
25453	Gdnf	5.67	4.98	5.39	3.88	3.11	3.44	0.666533
25454	Gfra1	0.97	0.98	0.99	1.74	2.08	2.36	-1.08893
25456	Glrb	0.32	0.37	0.61	1	1.29	0.8	-1.48288
25460	Hmmr	23.87	24.62	24.28	12.96	15.47	13.94	0.824198
25507	Pcsk6	3.15	2.94	2.99	4.76	4.81	4.7	-0.611392
25515	Plk1	41.24	37.05	40.8	20.35	22.15	24.43	0.871184
25556	Il1rl1	125.38	123.71	125.71	207.8	197.55	200.08	-0.648695
25560	Abcc9	4.33	3.92	4.32	1.88	2.65	2.24	0.935936
25586	Alpl	26.53	22.54	28.87	68.15	61.8	62.07	-1.25943
25610	Csf3	12.73	13.45	12.93	7.3	4.57	6.75	1.10779
25613	Ptprz1	1.28	1.88	1.43	1.97	2.58	2.38	-0.61939
25619	Plau	27.05	27.32	27.79	17.2	20.2	17.97	0.613329
25637	Ptger1	4.6	3.63	4.85	7.28	7.37	6.39	-0.663542
25644	Bmp6	13.58	11.13	11.96	29.62	30.49	23.75	-1.1491
25667	Bmp3	11.94	11.89	11.91	20.62	21.78	19.54	-0.749763
25694	Has2	61.33	60.47	57.63	28.34	30.55	26.56	1.11448
25695	Cebpd	142.9	141.57	148.97	92.46	95.54	97.59	0.643788
25717	Tgfb3	438.11	408.66	417.38	745.91	749.09	689.18	-0.737957
25729	Ccne1	21.22	21.62	23.09	13.85	14.23	15.47	0.639188
25737	Pcna	76.27	76.57	69.07	46.19	44.54	46.61	0.733485
25745	Myh9	279.49	226.87	279.14	433.21	364.69	456.18	-0.63709
257649	Cenpf	8.54	8.76	8.31	4.86	6.04	5.27	0.707761
257650	LOC257650	1.68	1.86	1.75	3.14	3.95	2.92	-0.870374
26295	Ogt	32.24	28.25	32.39	52.75	52.96	45.11	-0.683758
266760	Nalcn	0.83	0.68	0.66	1.17	1.47	1.37	-0.845896
282587	Cttnbp2	1.18	1.19	1.19	2.71	3.7	2.21	-1.22996
286894	Parm1	6.57	6.18	7.43	13.43	12.15	11.15	-0.820491
286895	Brinp2	0.54	0.7	0.67	1.64	1.36	1.73	-1.26418
286921	Akr1b8	492.83	490.8	491.91	264.75	267.15	280.62	0.902501
287129	Tmem204	1.08	1.05	1.11	3.17	2.23	2.22	-1.15952
287146	Chtf18	6.07	5.54	6.3	4.03	3.55	3.9	0.690369
287382	Mfap4	4.22	2.79	1.32	9.58	9.84	9.82	-1.77458
287606	Septin4	8.44	7.12	8.22	18.61	21.49	19.19	-1.27835
287830	Nup85	14.33	16.17	14.14	8.81	10.67	10.46	0.61941
287925	Pkp2	6.5	6.21	6.68	12.02	10.93	11.83	-0.802023
287961	Cdc45	7.49	7.92	6.06	3.51	2.97	4.26	0.982853
288079	Polq	0.79	0.76	0.63	0.48	0.42	0.38	0.814901
288242	Chaf1b	4.9	6.72	7.32	3.86	3.59	3.72	0.818019
288414	Rfc3	22.22	20.83	19.83	13.41	12.89	12.66	0.732742
288532	Mcm7	26.66	26.44	26.97	15.33	16.85	16.05	0.767658
288626	Mmp17	0.7	0.54	0.43	1.09	1.43	1.24	-1.06967
289054	Aspm	3.6	3.51	3.61	2.01	2.21	1.94	0.844691
289150	Cenpl	8.67	8.3	7.13	5.41	5.85	5.27	0.596175
289257	Spta1	3.09	2.93	2.55	6.24	6.82	5.29	-1.0519
289344	Hhat	2.43	2	2.39	4.35	4.73	3.64	-0.85356
289491	Mrpl1	2.59	10.66	5.15	1.83	3.51	2.07	1.39058
289586	Spata18	16.52	16.56	15.01	10.55	12.57	9.73	0.595693
289707	Lyar	32.43	33.33	31.94	20.58	20.13	19.07	0.751967
289993	Cdkn3	98.78	107.71	92.82	59.28	68.88	62.21	0.69752
289997	Dlgap5	20.08	20.37	20.03	12.44	14.68	13.8	0.608231
290326	Pbk	14.66	19	14.81	11.67	10.55	8.57	0.703747
290623	Cyp4f18	0.16	0.11	0.23	0.88	0.81	0.52	-2.11411
290842	Gins4	18.56	19.69	18.72	8.61	10.93	13.75	0.818319
291015	Ogn	49.96	52.51	53.78	88.94	87.44	85.98	-0.700729
291091	Serpinb1a	247.35	263.69	244.74	92.77	97.89	100.01	1.42076
291137	Gmnn	26.33	26.89	26.74	9.98	8.83	15.19	1.27453
291234	Mki67	22.27	22.24	22.46	12.65	14.4	11.21	0.85411
291245	Actn2	0.28	0.31	0.66	1.28	1.57	0.99	-1.55939
291441	Ska1	12.07	12.16	11.41	6.5	5.28	4.67	1.15417
29146	Jag1	2.15	2.04	2.11	3.3	4.06	3.6	-0.754139
29158	Fbln5	65.1	61.08	63.72	149.44	151.03	141.27	-1.17541
291656	Pcdhb3	0.87	0.45	0.81	1.9	1.56	1.41	-1.15331
291885	Mcm5	19.82	19.27	20.14	9.13	10.29	9.05	1.08573
291927	Orc6	13.24	13.07	11.71	6.94	7.49	6.34	0.913144
29194	Chka	5.8	5.3	6.72	9.29	8.83	9.2	-0.651737
291965	Kctd19	0.46	0.34	0.31	0.81	1.05	1.06	-1.34876
292071	Cdt1	10	8.4	8.65	4.93	5.1	4.72	0.916224
29209	Casq2	11.14	12.01	11.13	17.86	18.91	16.47	-0.590862
292130	Afap1l2	16.4	15.49	15.47	25.13	29.89	27.2	-0.754803
292206	Trip13	9.02	8.53	7.13	4.9	4.38	5.19	0.809222
29223	Ak4	26.9	30.78	24.61	15.62	17.49	15.24	0.723607
29237	Penk	414.47	419.71	429.58	832.55	790.87	797.71	-0.895785
292554	Aurkc	3.86	3.87	4.48	6.37	8.17	6.69	-0.749187
293052	Isg20	10.62	8.74	12.8	17.86	18.28	17.66	-0.700608
293056	Cpeb1	0.79	0.42	0.72	1.46	1.61	1.37	-1.12083
293502	Kif22	28.95	24.9	25.39	16.2	15.78	15.69	0.774357
293566	Cpxm2	0.53	0.55	0.46	2.12	2.18	2.13	-2.02105
29360	Selenop	43.74	44.65	42.23	79.84	79.41	79.7	-0.829195
293688	Tm7sf2	15.3	15.56	15.66	33.6	29.85	29.56	-0.957387
293693	Cdc42bpg	2.38	1.95	2.31	4.04	3.66	3.07	-0.651605
29373	Bmp2	6.74	6.08	6.71	8.65	13.18	9.15	-0.670397
29395	Hmgb2	45.93	49.47	39.67	27.36	23.88	31.37	0.748428
293996	Pdzd7	0.19	0.36	0.36	0.85	0.63	0.89	-1.3181
294074	Cep55	17.74	17.37	16.79	8.6	10.05	8.43	0.982664
294279	Col11a2	0.9	0.74	0.94	1.83	2.22	1.29	-0.956832
294286	Kifc1	19.59	17.98	19.01	11.97	11.5	10.71	0.770093
294520	Mical1	14.64	14.74	14.01	23.27	24.99	21.75	-0.645854
29456	Map1b	16.27	14.98	15.35	27.6	29.65	24.6	-0.768129
294594	Spata9	1.47	0.88	1.29	2.01	2.4	2.59	-0.905656
29464	Slc6a6	12.94	11.42	13.19	28.82	29.93	26.34	-1.1449
295263	Gabpb2	2.26	1.94	1.73	1.41	1.2	0.94	0.757922
29527	Ptgs2	172.11	160.74	163.22	111.78	111.41	92.63	0.695783
295538	Depdc1	9.65	10.7	10.84	7.42	6.64	6.3	0.658474
295586	Clcn6	5.65	5.19	5.3	8.38	9.02	7.58	-0.632046
29560	Hif1a	194.38	190.19	184.21	122.67	131.5	124.02	0.632013
29561	Lsamp	0.72	0.89	1.01	3.22	2.96	3.07	-1.67698
295631	Pla2r1	2.61	2.36	2.63	3.95	4.61	4.02	-0.687373
295661	Spc25	19.43	19.53	17.79	11.67	10.17	10.61	0.84775
29576	Ccn5	55.01	49.36	49.55	100.38	91.49	99	-0.877989
29578	Hnrnpa1	306.87	323.33	295.18	199.33	221.38	206.5	0.610125
29595	Htr2a	7.18	7.26	5.13	3.1	3.87	3.24	0.982246
296060	Arhgap11a	12.92	13.96	13.81	8.29	8.36	7.76	0.781284
29610	Tgfbr3	11.01	10.85	10.76	5.71	7.04	6.77	0.782316
296137	Bub1	12.91	14.39	12.2	9.32	8.78	7.45	0.673211
29619	Btg2	130	130.17	138.32	83.09	84.39	74.49	0.76394
29628	Gria3	11.35	12.06	11.16	21.36	20.89	16.57	-0.813042
296344	Mybl2	19.78	16.38	18.25	9.64	9	9.15	1.01031
296368	Ube2c	113.69	116.87	116.35	68.3	65.71	70.97	0.80022
296395	Kcng1	4.87	4.81	5.45	3	3.08	3.72	0.660045
29643	Sv2c	4.14	3.71	3.7	2.77	2.41	2.2	0.631172
296501	Hat1	36.33	40.22	36.63	25.63	26.43	25.39	0.589917
296545	C8g	3.16	4.25	3.17	7.32	6.76	5.77	-0.840681
296757	Napepld	2.16	2.36	1.79	1.29	1.09	1.24	0.742516
29685	Mcm6	26.72	27.55	27.26	15.65	15.45	13.86	0.902611
296883	Rpa3	54.4	68.21	54.1	39.06	37.24	42.39	0.615741
296913	Lsm8	65.73	66.95	67.34	41.44	44.16	44.84	0.658859
29717	Cacna1g	1.94	2	2.14	3.51	3.46	3.19	-0.698909
297176	Mad2l1	14.88	13.23	13.21	7.14	6.66	6.95	1.0371
29728	Mcm4	28.36	29.62	28.01	16.86	17.75	15.74	0.816354
297383	Rtkn	0.02	0.02	0.04	0.93	0.63	0.04	-5.15908
297444	Cfap100	2.79	2.59	2.69	6.71	7.74	6.31	-1.30817
297455	Lsm3	59.66	53.35	60.43	37.08	38.27	41.79	0.606453
297594	Cdca3	51.05	49.93	51.83	29.33	24.03	31.01	0.896006
297822	Tp53inp1	16.21	15.61	15.88	25.4	27.18	21.65	-0.667995
298019	Ctnnal1	3.3	3.23	3.53	6.06	4.97	4.86	-0.615506
298296	Pcsk9	0.4	0.06	0.24	1.01	0.65	0.64	-1.6715
298429	Rad54l	3.39	2.67	2.6	1.56	2.03	1.4	0.844467
298441	Nasp	27.37	30.97	28.63	17.47	20.27	18.43	0.678248
298533	Ago4	0.36	0.38	0.46	0.99	0.85	0.56	-0.973339
298534	Clspn	2.64	2.63	3.04	1.06	1.25	1.18	1.26665
298545	Cnksr1	2.63	1.89	3.15	4.31	4.46	3.73	-0.661744
298867	Klhl29	2.82	2.71	2.17	5.23	5.78	4.56	-0.976733
298890	Cyria	4.56	4.41	5.35	8.24	8.08	7.11	-0.681316
299112	Pole2	4.11	4.12	5.48	2.74	2.14	2.35	0.795103
299269	Ifi27l2b	69.82	76.41	67.3	145.04	133.03	157.17	-0.985559
299923	Ndrg1	29.51	28.79	28.03	16.19	19.61	15.97	0.782706
299933	Dscc1	4.8	6.89	6.59	2.48	3.54	2.72	1.11929
299996	Matn2	3.44	3.78	3.68	2.5	2.35	2.24	0.666145
300053	Kifc2	1.43	1.63	1.31	3.39	3.14	2.43	-0.99139
300057	Recql4	3.62	3.24	3.6	2.42	2.59	2.15	0.593201
300074	Fam227a	0.49	0.21	0.57	0.98	1.1	1.03	-1.30115
300206	Kansl2	32.93	23.97	31.01	24.73	20.24	14.85	0.616874
300266	Cbx5	34.64	45.18	35.54	26.27	26.67	23.41	0.619094
300713	Slc35f2	3.92	3.81	4.13	7.12	6.46	6.01	-0.650157
300795	Pclaf	24.57	25.93	31.1	12.39	9.24	11.15	1.36416
300802	Aph1b	0	12.93	0	0	0	0	21.2604
300982	Abhd14a	5.29	4.15	4.14	8	6.53	7.82	-0.757943
301323	Prim2	9.86	8.52	8.65	7.41	5.33	5.65	0.598528
301351	Cracdl	0.77	0.62	0.89	1.44	1.71	1.23	-0.881266
301701	Ndc80	11.93	14.01	11.04	5.64	5.92	6.57	0.962591
302248	Nid2	109.85	102.49	105.02	163.53	181.97	163.35	-0.637742
302396	Nexmif	0.25	0.25	0.25	0.79	0.8	0.52	-1.44979
302983	Mapk8ip3	27.63	22.49	27.94	44.41	48.12	38.17	-0.683035
303037	Spdl1	8.03	6.76	7.13	4.26	4.82	4.01	0.789648
303164	Zfp692	9.47	8.37	11.3	17.69	16.08	14.95	-0.644548
303348	Atad5	1.45	1.74	1.73	1.11	1.13	0.83	0.734385
303384	Mmp28	0.12	0	0	0.13	1.1	0.54	-4.36445
303566	Hrob	2.95	2.5	2.39	1.5	1.56	1.46	0.835473
303575	Kif18b	10.15	9.38	11.3	6.52	7.08	6.6	0.653039
304477	Kntc1	7.04	6.47	6.55	4.09	3.71	3.76	0.844029
304528	Rfc5	12.95	14.46	15.94	9.93	7.8	8.84	0.747643
304573	Pole	4.87	5.1	5.15	2.95	3.7	2.97	0.698566
304648	Asf1b	17.74	19.27	19.86	10.8	11.6	9.21	0.894209
304807	Rabif	0	0	13.56	0	0	0	21.8792
304813	Ppp1r12b	5.51	4.78	5.26	7.71	9.29	7.17	-0.637919
304929	F5	1.77	1.86	2.28	0.92	1.29	0.97	0.944334
304951	Nuf2	20.75	20.66	20.8	11.98	12.42	10.39	0.883284
304983	Tagln2	1146.35	1158.01	1171.67	802.75	762.93	791.63	0.601881
304984	Cfap45	9.71	12.1	11.94	7.02	6.59	6.85	0.765212
304988	Mnda	9.86	10.02	11.22	6.36	6.31	6.44	0.7447
305000	Exo1	1.69	1.59	1.55	0.82	0.81	0.84	1.00668
305012	Kif26b	1.71	1.71	1.84	3.39	4.82	3.58	-1.11847
305021	Sccpdh	35.5	37.48	36.01	25.67	25.84	20.06	0.65607
305073	Dtl	6	5.81	5.1	2.76	3.07	3.02	0.958928
305096	Klhdc8a	26.43	24.74	25.01	48.02	49.71	48.7	-0.900578
305332	Limch1	1.22	0.94	1.03	2.22	2.48	1.66	-0.940549
305353	Tlr6	3.25	4.03	3.86	5.93	6.7	4.87	-0.612302
305392	Ncapg	8.29	9.33	7.51	4.78	4.66	4.57	0.888781
305423	C1qtnf7	6.65	6.3	5.48	10.41	10.28	9.98	-0.703835
305472	Pik3ip1	2.72	2.27	2.37	5.07	5.46	4.15	-0.795899
305497	Cobl	2.93	3.34	2.91	4.92	5.26	4.87	-0.689716
305827	Wdhd1	7.7	7.41	6.81	4.8	5.71	4.14	0.627369
305984	Cdca2	8.33	7.99	8.51	4.87	5.59	5.18	0.713683
306226	Dux4	1.29	1.18	1.55	2.62	2.55	1.75	-0.767275
306356	Cilp2	0.3	0.36	0.36	1.38	1.04	1.08	-1.72675
306451	Tenm3	2.66	2.62	2.44	4.38	4.85	4.28	-0.765606
306464	Cenpu	6.24	5.75	6.62	3.01	3.43	3.2	0.999713
306575	Ckap2	45.76	48.61	48.05	25.67	29.31	28.74	0.809198
306586	Amt	1.57	1.05	2.11	3.88	2.62	3.06	-0.976922
306722	Dapk1	0.37	0.37	0.38	0.97	1.01	0.72	-1.21845
306748	Cxcl14	8.18	6.51	7.34	3.9	3.11	3.12	1.16199
307056	Anlnl1	11.55	10.85	10.07	7.58	7.19	5.54	0.72331
307126	Mcm10	4.33	4.26	4.21	1.83	2.22	1.95	1.13613
307169	Mastl	9.56	9.67	9.49	4.73	5.14	6.03	0.859017
307393	Sh3tc2	0.52	0.25	0.34	1.03	1.1	0.87	-1.39482
307511	Cdc25c	8.12	9.08	9.76	6.18	6.51	5.54	0.609965
307805	Cenpt	12.5	13.84	14.46	9.1	7.38	9.77	0.671754
307926	Ccsap	5.08	6.18	6.32	4.36	4.27	3.47	0.635901
308064	Cep72	4.7	4.27	4.06	2.44	3.16	2.86	0.650917
308099	Fndc1	18.09	16.45	16.65	39.29	45.89	35.67	-1.20436
308345	Kmt5c	12.07	9.42	12.51	20.88	18.13	14.93	-0.603013
308445	Cyp2s1	0.2	0.16	0.2	0.61	0.8	0.62	-1.83055
308509	Garre1	16.75	15.25	15.87	30.12	31.62	26.99	-0.831563
308562	Klk14	3.15	2.58	3.83	8.1	6.39	6.29	-1.07846
308588	Ca11	12.42	10.64	14.92	20.53	21.78	19.48	-0.677066
308602	Tmem86a	1.04	0.76	1.01	1.76	2	2.74	-1.17707
308607	E2f8	1.93	1.6	1.64	0.98	0.95	0.93	0.894736
308755	Blm	2.81	2.43	3.59	2.05	2.28	1.99	0.651545
308761	Prc1	55.86	55.4	56.98	34.97	33.06	33.44	0.769766
308768	Ticrr	2.33	2.51	2.07	1.6	1.45	1.03	0.803827
308790	Mex3b	2.46	2.45	1.95	3.54	4.05	3.91	-0.700952
308807	Prss23	146.65	146.07	152.69	368.71	389.18	353.94	-1.27592
308854	Chrdl2	11.5	9.53	10.49	7.2	6	5.75	0.790138
309150	Carns1	1.4	1.34	1.46	3.1	2.77	2.41	-0.957451
309523	Kif20b	6.34	7.33	6.45	3.9	4.33	4.05	0.776544
309646	Slc26a8	1.6	1.25	1.63	2.55	2.66	2.18	-0.675852
310344	Plk4	11.3	11.21	9.83	6.71	6.69	6.62	0.738232
310352	Jade1	19.6	19.37	18.32	29.46	31.27	28.45	-0.596806
310483	Mlf1	1.48	2.54	1.69	0.49	0.5	0.59	1.88861
310537	RGD1560010	13.38	13.25	11.83	8.27	9.3	7.51	0.66185
310621	Iqgap3	10.78	10.01	10.74	6.79	6.34	6.17	0.750558
311210	Tspan18	91.31	82.31	90.85	152.18	149.76	141.03	-0.700396
311252	Pamr1	2.46	3.24	3.53	4.42	5.49	5.19	-0.662628
311325	Knstrn	22.97	24.66	25.79	14.35	14.72	16.14	0.747127
311327	Knl1	4.66	4.81	4.53	3.2	3.42	2.81	0.615153
311336	Nusap1	17.11	18.9	18.08	12.63	12.76	10.33	0.649767
311396	Atp8b4	2.38	2.29	2.18	0.95	0.89	1	1.30921
311437	Rassf2	0.44	0.48	0.47	1.24	1.33	1.63	-1.53626
311546	Tpx2	37.03	40.86	36.81	24	24.86	24.35	0.698588
311570	Myh7b	1.07	0.64	0.79	1.38	1.73	1.31	-0.760307
311598	Fam83d	9.88	9.51	9.7	5.63	6.33	6.47	0.70038
311642	Sulf2	85.36	79.69	83.13	143.5	154.02	137.81	-0.759541
311716	Col20a1	1.78	1.5	1.69	2.73	3.07	2.26	-0.652991
311742	Cdca7	5.35	4.03	4.62	2.81	1.93	1.9	1.11976
312299	Ezh2	13.22	11.95	12.59	7.78	9.44	8.63	0.589437
312538	Mcm2	22.25	22.48	21.73	13.18	16.23	13.68	0.674064
312566	Adamts9	2.55	2.47	2.74	4.29	5	4.12	-0.713559
312688	Usp18	3.37	2.72	3.56	1.48	1.74	1.85	0.970445
313108	Mms22l	5.78	6.73	6.36	3.53	3.9	3.93	0.755517
313170	Kif24	1.08	1.25	1.26	0.49	0.68	0.84	0.879931
313234	Tbc1d2	9.48	10.08	10.67	18.03	17.88	20.01	-0.738731
313255	Whrn	1.3	1.63	1.71	2.74	2.94	2.36	-0.745086
313479	Orc1	4.47	3.92	3.99	2.39	1.99	1.59	0.812752
313490	Tmem8b	3.77	3.74	4.09	6.18	6.71	5.82	-0.644849
313506	Stil	4.08	3.87	3.71	2.67	2.75	2.33	0.634606
313689	Dhrs3	68.34	68.37	71.17	150.02	153.55	156.5	-1.10413
314322	Fos	21.81	22.31	23.53	11.4	10.94	9.78	1.11891
314323	Flvcr2	9.15	10.28	9.58	14.73	18.12	14.57	-0.663016
314397	Rin3	12.9	11.28	13.44	19.21	21.38	19.32	-0.607147
314626	Adamtsl5	5.63	4.91	6.06	10.98	9.42	10.22	-0.896703
314639	Zfr2	1.7	0.9	1.89	2.43	2.72	2.84	-0.80559
314654	Myo1f	3.14	2.74	3.47	5.11	5.29	4.45	-0.621276
314818	E2f7	2.54	2.39	2.33	1.38	1.51	1.01	0.956238
314993	Atad2	8.58	9.74	8.54	4.84	4.82	5.36	0.879983
315164	Cenpm	32.82	33.69	32.81	22.28	22.94	18.15	0.694703
315298	Racgap1	23.56	24.97	22.48	13.94	13.42	13.61	0.829428
315330	Espl1	6.18	5.84	5.48	3.16	3.47	2.88	0.928252
315508	Ncapd3	7.26	7.3	7.77	5.34	5.03	4.74	0.612261
315546	Kirrel3	0	0.11	0.1	0.25	0.31	0.55	-2.44335
315567	Panx3	4.36	3.76	4.9	7.33	8.31	8.15	-0.827242
315711	Sema7a	30.91	28.51	30.33	48.77	52.67	44.56	-0.692041
315740	Kif23	15.92	17.39	15.61	10.26	10.11	10.29	0.725933
315852	Ttk	9.23	10.4	9.32	5.46	5.15	5.21	0.917539
315907	Nrk	4.07	4.32	4.25	7.31	6.79	6.45	-0.637992
315969	Topbp1	7.01	6.71	7.11	4.19	5.55	4.61	0.588884
316009	Plxnb1	0.91	0.59	0.85	1.35	1.49	1.46	-0.832667
316077	Entpd3	0.03	0.4	0.2	0.82	0.94	0.74	-1.92392
316098	Exosc7	17.97	18.44	17.99	10.81	12.55	13.84	0.588642
316129	Uhrf1	15.91	12.31	13.85	7.28	8.38	8.84	0.803033
316273	Mcm3	18.92	17.48	18.68	11.19	11.09	10.12	0.808598
316425	Sgo2	3.81	3.29	3.07	2.41	2.08	2.12	0.688839
316573	Dner	60.75	56.59	56.71	39.76	39.91	38.94	0.595344
316602	Hjurp	6.86	7.18	7.37	4.03	4.86	4.35	0.737597
316736	Emilin2	4.14	3.53	4.2	2.01	2.77	1.85	0.878704
316740	Myom1	1.32	1.49	1.58	3.44	3.99	2.54	-1.1335
317218	Itm2a	1.97	1.56	2.83	5.45	4.65	4.8	-1.18704
317252	Ercc6l	3.42	3.18	2.91	1.64	1.71	1.92	0.890532
317253	Nhsl2	6.47	5.63	6.13	9.44	11.13	7.94	-0.599341
317322	Gpc4	85.15	83.8	83	134.14	138.95	135.6	-0.647952
338475	Nrep	6.14	7.07	7.03	10.92	10.79	10.94	-0.68587
353227	Zbtb16	0.53	0.49	0.34	0.79	1.01	0.84	-0.918527
353302	Kif15	4.23	4.39	4.02	2.42	2.39	2.19	0.897088
360243	Top2a	29.02	28.82	26	13.34	14.3	14.39	1.03782
360417	Ptprq	0.5	0.39	0.4	0.92	0.9	0.74	-0.945512
360588	Brip1	2.57	3.06	3.07	1.65	1.59	1.35	0.954562
360591	Prr11	10.21	9.59	9.11	4.78	5.81	4.56	0.965659
360621	Cdc6	8.61	8.59	8.15	3.19	4.32	4.43	1.12802
360711	Cip2a	2.83	3.05	2.8	1.91	1.78	1.49	0.791429
360721	Fam162a	310.08	322.95	297.5	218.08	205.56	202.58	0.604971
360824	Wscd2	0.48	0.33	0.69	0.87	0.98	0.93	-1.18052
360847	Ube2t	9.46	9.83	8.19	5.54	6.09	4.2	0.843054
360849	Kif14	2.29	2.16	2.25	1.28	1.23	1.29	0.861127
360904	Idua	49.51	40.5	48.68	71.19	75.86	64.27	-0.587703
360942	Pcdh7	2.24	2.31	2.19	4.83	4.29	3.4	-0.88604
360962	Tacc3	27.95	29.12	30.43	17.9	19.26	17.15	0.703468
361047	Ska3	11.37	13.14	12.95	7.83	6.67	7.4	0.826652
361066	RGD1308117	4.24	3.38	4.03	6.94	6.35	7.46	-0.73728
361282	Plxdc2	77.11	70.97	75.75	145.3	153.39	135.55	-0.94798
361303	Lims2	57.19	54.49	56.67	91.12	101.18	90.96	-0.680504
361308	Kif20a	52.7	51.17	50.38	34.83	34.52	31.21	0.661567
361414	Vat1l	0.96	1.17	0.85	2.31	2.76	2.25	-1.25478
361416	Cenpn	14.17	14.45	14.28	8.91	9.23	9.52	0.662649
361435	Fanca	2.79	3.24	3	1.51	1.75	1.34	1.02502
361506	Leng8	38.7	27.58	37.88	57.37	65.78	49.97	-0.705003
361508	Mzf1	3.17	2.73	3.3	5.29	4.57	4.54	-0.603814
361921	Ect2	9.15	9.8	8.92	5.58	5.31	5.09	0.845687
361923	Rpl22l1	196.84	208.66	193.58	129.8	118.74	137.61	0.67383
362044	Cenpe	8.03	9.81	7.83	5.29	6.19	5.04	0.68549
362186	Kif18a	3.39	4.24	3.43	2.08	2.28	2.69	0.674358
362334	Tmem140	4.73	2.93	3.94	6.53	6.82	6.29	-0.72049
362412	Rad18	10.53	10.12	8.52	7	6.01	6.03	0.659064
362415	Ttll3	3.19	2.22	3.35	4.63	4.73	4.36	-0.659839
362429	Mfap5	32.76	28.76	30.18	58.48	48.61	48.96	-0.677924
362465	Tmtc1	0.65	0.75	0.66	1.11	1.24	0.95	-0.63091
362485	Ccne2	14.88	14.54	12.07	8.53	6.2	7.54	0.928003
362510	Melk	8.34	8.12	8.15	4.48	5.86	4.91	0.719324
362519	Smc2	14.75	16.08	13.5	9.02	9.49	9.96	0.676913
362626	Rsrp1	48.09	42.58	52.37	79.44	85.02	70.58	-0.671919
362657	Mthfr	4.33	4.02	4.29	8.32	8.23	7.82	-0.883867
362720	Rrm2	111.71	113.49	108.55	53.63	54.55	56.01	1.06528
362779	Vrk1	13.37	13.4	14.36	9.32	7.77	9.54	0.657051
362798	Ncapg2	5.47	5.91	5.37	3.68	3.7	3.49	0.668675
362817	Cdk2	11.86	12.12	10.56	8.04	7.22	7.53	0.655583
363031	Anln	41.29	41.09	38.4	21.98	23.65	20.58	0.912423
363085	Ca12	3.43	3.36	3.25	1.23	1.8	1.05	1.34975
363088	Ccnb2	14.88	15.1	15.95	11.53	8.22	10.7	0.636775
363152	Stac	5.46	4.41	5.13	3.01	3.56	3.36	0.673429
363174	Sgo1	3.83	4.18	3.51	2.32	2.29	2.26	0.790668
363195	Gtpbp2	19.08	16.05	18.49	27.75	31.17	25.19	-0.604341
363198	Cenpq	6.37	6.19	4.91	2.89	4.51	2.84	0.820266
363276	Snorc	0.82	0.4	0.8	1.71	1.69	1.22	-1.20843
363333	Chaf1a	10.07	8.16	8.05	5.69	5.82	5.13	0.701502
363674	Stac2	7.49	6.02	6.72	2.88	3.78	3.43	1.0442
364648	Shcbp1	6.47	6.71	6.68	3.7	3.49	4.17	0.845911
364754	Fzd8	3.55	4.03	5.26	8.51	7.77	7.07	-0.910344
366859	Glt8d2	10.14	9.99	9.32	6.69	5.85	5.73	0.73012
366909	Slc26a10	4.11	3.12	3.17	6.87	9.77	6.85	-1.11002
367196	Acad8	7.55	6.26	8.37	12.27	12.12	12.78	-0.703391
367298	Slc23a3	0.22	0.14	0.54	1.48	1.04	0.93	-1.8043
367384	B3gntl1	5.17	5.53	5.77	7.97	9.22	7.48	-0.592269
394266	Gjb2	10.97	11.52	12.91	20.03	22.19	19.53	-0.758081
414784	RT1-T24-4	7.74	7.73	7.08	4.99	6.18	3.81	0.644094
436582	Atp6v0e2	13.38	14.38	15.2	21.67	24.42	20.88	-0.595405
497672	Brca1	2.25	2.73	2.44	1.51	1.83	1.35	0.707801
497778	Dut	70.44	65.57	62.01	39.26	47.32	38.72	0.660596
497811	Xdh	19.93	19.7	18.93	8.09	10.03	8.2	1.19864
498072	Hmgb2l1	26.73	28.27	34	17.01	16.93	15.1	0.904311
498310	Nsl1	2.78	3.67	3.29	1.64	2.32	2.11	0.69156
498564	Itgbl1	17.99	20.51	17.32	31.36	33.28	33.7	-0.774187
498709	Cks2	67.51	80.2	75.58	37.72	38.54	46.99	0.898033
498847	Pcdhga3	1.25	1.37	1.02	2.39	2.18	1.91	-0.788981
498999	Ahrr	8.42	8.48	8.84	4.4	4.62	3.83	1.04706
499095	Zfp94	1.89	1.94	1.84	3.23	2.69	3.02	-0.682804
499110	Zfp780b	1.73	1.77	1.59	2.61	3.09	2.47	-0.641216
499204	Ddias	3.82	4.19	3.92	2.56	2.08	2.3	0.822799
499270	Prss53	1.11	0.97	0.7	1.87	1.62	1.98	-0.918811
499322	Fam111a	6.86	7.05	6.4	3.66	3.87	3.66	0.902832
499839	RGD1564664	24.24	25.43	26.63	75.16	60.73	70.3	-1.39382
499870	Rad51	11.8	11.08	10.6	5.46	3.86	5.42	1.22084
499914	Gins1	13.63	11.66	10.1	5.95	5.93	5.03	1.10869
499966	Xrcc2	4.09	4.06	3.46	2.91	2.56	1.75	0.732652
500076	Agbl3	2.31	2	2.75	7.27	6.69	6.05	-1.31956
500502	Eqtn	1.12	0.88	1.54	1.3	1.35	1.05	-0.712276
500545	Cdca8	29.74	30.33	29.05	15.12	18.45	17.41	0.849585
500707	Tc2n	0.51	0.41	0.58	1.26	1.22	1	-1.19473
500987	H2ax	110.89	114.69	113.41	74.82	75.06	74.09	0.6405
501043	Il20rb	4.89	5.02	4.41	2.44	1.93	2.26	0.9893
502317	Aplp1	39.9	40.39	41	67.25	67.43	65.59	-0.677835
54237	Cdk1	103.84	105.38	103.24	66.03	60.5	62.96	0.761497
548104	Pcdhb17	0.67	0.43	0.54	0.99	1.41	1.24	-1.12219
56083	Tgm2	57.16	54.5	55.49	109.95	117.53	114.04	-0.988523
58812	Apln	4.4	4.44	4.38	1.91	2.5	2.37	1.00685
58813	Nt5e	15.23	14.51	14.89	9.19	8.97	9.04	0.756279
58935	Gas6	149.67	137.64	146.64	241.2	254.78	240.78	-0.720193
58940	H2az1	131.61	130.35	124.63	85.57	79.39	85.33	0.668039
58968	Acan	10.36	9.65	10.42	4.47	6.04	4.71	1.04554
59102	Rpa2	21.39	22.15	24.85	15.64	13.33	13.92	0.715268
59103	Ptges	27.83	29.84	27.46	17.84	17.71	18.95	0.684613
59294	Pold1	6.43	7.04	6.44	4.07	3.78	3.73	0.852905
59325	Ereg	3.68	3.41	1.79	0.72	0.74	0.35	2.34886
59327	Twist2	7.99	8.56	9.39	5.5	5.26	4.6	0.801062
60416	Pfkp	35.77	37.25	34.98	23.79	25.22	24.28	0.60209
60582	Il1rn	469.71	474.98	454.68	176.05	196.23	194.85	1.36292
60669	Cmklr1	1.52	0.98	0.9	2.42	2.69	2.21	-0.9569
63843	P2ry4	3.45	2.96	2.77	6.73	5.51	4.38	-0.899297
64041	Birc5	38.56	35.79	34.24	18.4	22.38	24.14	0.782521
641315	Iffo2	17.77	16.79	17.49	8.83	14.06	10.83	0.672405
64193	Pttg1	56.52	71.8	61	35.09	36.89	35.78	0.818144
64347	Sncg	40.22	41.99	43.41	26.09	26.04	31.31	0.630184
64362	Des	12.17	11.05	10.33	6.8	6.23	6.75	0.80236
64387	Ccdc80	896.23	864.32	865.35	1378.93	1486.6	1386.73	-0.652404
64455	Rasd1	18.1	15.67	19.1	11.32	10.45	10	0.720766
64456	Spon1	2.77	2.77	3.07	7.28	7.9	7.5	-1.35627
64507	Fmod	25.67	24.74	25.59	46.85	47.27	43.44	-0.812747
64515	Cdc20	43.9	40.75	44.8	25.29	27.74	27.31	0.730049
64557	Bard1	3.92	3.68	3.73	1.89	2.35	1.75	0.966139
64558	Fzd4	1.35	1.32	1.47	2.3	2.61	2.4	-0.778298
64576	Ptprv	6.31	5.25	6.62	10.21	11.07	8.97	-0.682957
64626	Rem2	9.99	9.17	9.3	3.68	3.4	4.57	1.32569
64678	Tfrc	36.48	38.25	34.51	22.02	22.67	20.23	0.795709
65195	Kcnd3	1.65	1.54	1.22	2.13	2.85	1.98	-0.59402
679272	Marchf9	2.06	2	2.05	3.38	4.33	3.69	-0.859399
679342	Cenpp	4.83	4.96	4.97	3.06	2.51	2.82	0.85558
680111	Rbl1	6.38	5.97	4.75	3.64	3.99	2.8	0.759888
680280	Gas2l3	4.57	5.06	4.39	2.2	2.3	2.11	1.13164
680415	Pappa2	5.64	5.07	5.77	12.4	13.58	12.29	-1.17171
680434	Dqx1	1.67	0.92	1.49	2.27	3.26	2.92	-1.00671
680451	Nrbp2	16.18	12.52	15.65	32.1	33.97	29.47	-1.06424
680515	Ckap2l	18.57	16.91	16.49	10.67	12.1	11.83	0.628223
680611	Bcl3	8.76	8.19	9.14	6.07	5.25	5.3	0.700356
681185	Cenph	13.15	12.5	10.47	6.21	6.98	8.91	0.747099
683206	Tnfaip3	5.04	5.1	4.63	8.41	8.99	8.16	-0.742368
684439	Cenpo	4.5	4.77	4.07	2.28	3.22	2.44	0.796395
684771	Cdca5	7.7	8.15	7.06	4.35	3.55	3.04	1.13271
684934	Ccdc9	13.64	12.32	11.56	20.69	21.2	19.52	-0.66833
685243	Ackr4	28.55	31.7	30.53	20.34	19.46	19.19	0.664175
685433	Evi2a	8.1	8.28	7.38	5.32	4.36	4.35	0.801811
685579	Rrm1	54.36	52.05	50	28.87	31.79	30.16	0.826667
685611	Phldb2	15.91	18.25	19.41	32.69	29.49	33	-0.789326
686432	Ly6l	4.46	4.94	4.45	7.53	7.32	9.42	-0.770311
688413	Lce1m	0.84	0.82	1.97	7.83	4.28	6.96	-2.40872
688452	Spaca6	2.64	2.14	2.34	3.9	4.31	3.81	-0.752185
688459	LOC688459	9.62	10.05	9.72	7.44	5.95	4.91	0.72833
688990	Trnp1	6.53	5.85	6.46	10.57	7.88	11.99	-0.655915
689039	LOC689039	2.36	2.2	2.3	5.11	6.71	6.89	-1.40822
689055	Rad51ap1	5.52	5.8	6.71	2.8	3.15	3.24	0.863833
689088	Ldlrad1	3.66	2.15	2.62	6.68	6.25	5	-1.06484
689116	Ncbp2	26.05	30.36	28.56	14.83	24.81	14.76	0.693896
689296	Mis18bp1	3.39	3.57	3.16	2.19	2.49	2.2	0.600361
689388	Ptx3	32.12	30.76	32.59	20.96	22.26	20.88	0.617776
689399	Cenpw	4.99	7.83	7.63	3.17	3.85	3.82	0.961514
689523	Lin9	4.16	4.1	3.29	3.04	2.47	2.25	0.606717
689619	Nrip2	1.8	1.55	0.77	3.77	3.53	3.82	-1.40786
689914	Trabd2b	2.37	1.83	2.37	3.27	3.26	2.52	-0.733631
691246	Rnf207	0.64	0.51	0.78	1.2	1.56	1.28	-1.01936
691543	Katnbl1	0	0.24	0	1.74	3.95	4.41	-5.36235
691920	Stard9	1.52	1.26	1.22	2.08	2.63	1.83	-0.677374
691979	Esco2	4.86	6.64	4.92	3.36	2.83	2.88	0.900724
81008	Itga7	31.25	29.3	30.69	45.5	54.22	44.12	-0.600367
81506	Bst1	147.24	150.97	146.81	103.81	98.26	96.59	0.617916
81509	Bdkrb1	6.53	6.13	6.82	3.26	3.49	4.58	0.615943
81513	Lig1	21.56	23.08	23.1	13.8	16.04	15.07	0.636743
81526	Ccn3	238.4	223.6	236.55	363.79	384.79	343.16	-0.600694
81679	Jup	12.54	11.47	11.27	18.51	19	17.81	-0.609667
81687	Mmp9	2.73	2.73	2.69	6.59	6.4	5.92	-1.16999
81744	Pde7a	6.02	5.27	5.28	8.2	9.51	9.46	-0.682652
81801	Stc1	37.44	35.45	34.68	19.38	20.5	17.2	0.958612
81809	Tgfb2	72.04	67.83	70.54	109.24	109	98.04	-0.589648
83425	Akap12	240.28	243.41	238.85	442.06	477.53	421.31	-0.847856
83467	Slit3	14.41	12.04	13.98	21.77	23.56	18.32	-0.609737
83498	Hnrnpab	419.48	419.65	405.96	225.4	229.51	348.08	0.710165
83514	Tsc22d3	70.12	73.86	64.89	125.95	129.12	131.05	-0.843734
83521	Rrad	2.46	4.27	3.31	2.15	1.41	1.48	1.04729
83580	Thbd	19.88	19.24	20.07	10.47	10.28	10.14	0.98071
83585	Gda	32.45	35.48	30.1	19.71	20.54	20.53	0.731925
83722	Plk2	20.33	20.24	20.48	37.1	37.95	34.9	-0.805418
83834	Nrn1	10.1	12.22	11.38	8.77	6.62	7.51	0.599096
84393	Kif4a	8.88	8.31	8.4	4.33	5.46	4.92	0.844338
84402	Sfrp1	71.75	74.01	74.85	46.12	49.81	45.15	0.688809
84409	Robo2	0.62	0.69	0.77	1.29	1.33	1.12	-0.778635
84490	Fen1	13.8	12.84	14.3	7.47	8.68	8.28	0.838114
84596	Srm	128.51	102.16	93.02	83.28	69.93	64.16	0.615521
84683	Cox4i2	147.92	147.13	161.63	93.78	99.62	101.85	0.676906
85241	Pola1	4.09	4.39	3.85	2.89	3.09	2.47	0.590396
85242	Pola2	10	8.98	7.83	5.69	4.98	5.64	0.756723
85245	Kpna2	119.22	119.61	112.17	76.37	79.48	73.2	0.65749
85267	Slc24a3	9.59	9.83	9.57	15.47	16.01	14.55	-0.622743
89803	Sfrp4	7.91	6.49	6.84	4.01	4.45	3.98	0.814551
89804	Tek	0.58	0.57	0.77	1.73	1.37	1.33	-1.16743
89829	Socs3	17.15	14.22	17.76	6.67	3.5	4.35	1.77901
89830	Ptch1	3.21	3.17	3.4	2.06	2.39	1.75	0.706158
93662	Cdhr1	2.66	2.59	2.96	1.86	1.78	1.81	0.633744
94193	Madd	0.79	0.89	0.65	1.42	1.37	1.24	-0.74465
94203	Pgf	16.52	16.98	16.07	28.11	27.16	28.05	-0.707485
